# Supplementary material for: Identification of Factors Affecting Self-Efficacy in Women with Spontaneous Pregnancy Loss
Source: MDPI journal article supplement (doi:10.3390/healthcare11091217), 2023-04-25
Supplement: s1 [file s1]

## ***SURVEY QUESTIONNAIRE***

## 1. Age

- a) < 25 y/o
- b) 26–30 y/o
- c) 31–35 y/o
- d) >35 y/o

## 2. Education

- a) Primary education
- b) Secondary education
- c) College/university

### 3. Residence

- a) Urban – province capital
- b) Urban – other
- c) Rural

#### 4. Relationship status

- a) Married
- b) Single

## 5. Professional activity

- a) Professionally inactive
- b) White-collar work
- c) Blue-collar work

## 6. Self-reported financial standing

- a) Verygood
- b) Good
- c) Moderate
- d) Bad

## 7. Planned pregnancy

- a) No
- b) Yes

8. Please rate the level of support received from specific sources in the hospital by marking the answers on a 10-point scale. 1 means that the support was completely insufficient and 10 completely sufficient.

[illegible]

9. On a scale of 1 to 5, please rate the quality of care that you received during your hospitalization by marking your answer with an X.  
> 1 denote spoor quality, 5 — perfect quality.

| Quality of care | 1                        | 2                        | 3                        | 4                        | 5                        |
|-----------------|--------------------------|--------------------------|--------------------------|--------------------------|--------------------------|
| a) Gynecologist | <input type="checkbox"/> |
| b) Midwife      | <input type="checkbox"/> |
| c) Psychologist | <input type="checkbox"/> |

10. Please rate the following items regarding the care that you received during your hospitalization.

| Statements                                                                                   | 1<br>strongly<br>disagree | 2<br>disagree            | 3<br>no opinion          | 4<br>agree               | 5<br>strongly<br>agree   |
|----------------------------------------------------------------------------------------------|---------------------------|--------------------------|--------------------------|--------------------------|--------------------------|
| They explained how I should prepare for diagnostic/treatment procedures                      | <input type="checkbox"/>  | <input type="checkbox"/> | <input type="checkbox"/> | <input type="checkbox"/> | <input type="checkbox"/> |
| They informed me about what to do after leaving the hospital                                 | <input type="checkbox"/>  | <input type="checkbox"/> | <input type="checkbox"/> | <input type="checkbox"/> | <input type="checkbox"/> |
| They were willing to answer questions                                                        | <input type="checkbox"/>  | <input type="checkbox"/> | <input type="checkbox"/> | <input type="checkbox"/> | <input type="checkbox"/> |
| They provided complete information about my health                                           | <input type="checkbox"/>  | <input type="checkbox"/> | <input type="checkbox"/> | <input type="checkbox"/> | <input type="checkbox"/> |
| They informed my relatives about my health and needs                                         | <input type="checkbox"/>  | <input type="checkbox"/> | <input type="checkbox"/> | <input type="checkbox"/> | <input type="checkbox"/> |
| They provided information about diagnostic procedures                                        | <input type="checkbox"/>  | <input type="checkbox"/> | <input type="checkbox"/> | <input type="checkbox"/> | <input type="checkbox"/> |
| They provided guidance and advice if necessary                                               | <input type="checkbox"/>  | <input type="checkbox"/> | <input type="checkbox"/> | <input type="checkbox"/> | <input type="checkbox"/> |
| They provided information about support groups for pregnancy loss and other ways to get help | <input type="checkbox"/>  | <input type="checkbox"/> | <input type="checkbox"/> | <input type="checkbox"/> | <input type="checkbox"/> |
| They expressed willingness to help                                                           | <input type="checkbox"/>  | <input type="checkbox"/> | <input type="checkbox"/> | <input type="checkbox"/> | <input type="checkbox"/> |
| They tried to ensure peace and quiet                                                         | <input type="checkbox"/>  | <input type="checkbox"/> | <input type="checkbox"/> | <input type="checkbox"/> | <input type="checkbox"/> |
| They respected my privacy                                                                    | <input type="checkbox"/>  | <input type="checkbox"/> | <input type="checkbox"/> | <input type="checkbox"/> | <input type="checkbox"/> |
| They considered my opinion                                                                   | <input type="checkbox"/>  | <input type="checkbox"/> | <input type="checkbox"/> | <input type="checkbox"/> | <input type="checkbox"/> |
| They were interested in what I was doing and how I was feeling                               | <input type="checkbox"/>  | <input type="checkbox"/> | <input type="checkbox"/> | <input type="checkbox"/> | <input type="checkbox"/> |
| The medical staff gave me a sense of security                                                | <input type="checkbox"/>  | <input type="checkbox"/> | <input type="checkbox"/> | <input type="checkbox"/> | <input type="checkbox"/> |
| They were kind and respectful                                                                | <input type="checkbox"/>  | <input type="checkbox"/> | <input type="checkbox"/> | <input type="checkbox"/> | <input type="checkbox"/> |
| They allowed me to express my emotions                                                       | <input type="checkbox"/>  | <input type="checkbox"/> | <input type="checkbox"/> | <input type="checkbox"/> | <input type="checkbox"/> |
| They were delicate when giving me the news about the pregnancy loss                          | <input type="checkbox"/>  | <input type="checkbox"/> | <input type="checkbox"/> | <input type="checkbox"/> | <input type="checkbox"/> |
| They expressed sympathy                                                                      | <input type="checkbox"/>  | <input type="checkbox"/> | <input type="checkbox"/> | <input type="checkbox"/> | <input type="checkbox"/> |
| They supported me with specific gestures                                                     | <input type="checkbox"/>  | <input type="checkbox"/> | <input type="checkbox"/> | <input type="checkbox"/> | <input type="checkbox"/> |
| They adjusted the daily schedule to my needs if possible                                     | <input type="checkbox"/>  | <input type="checkbox"/> | <input type="checkbox"/> | <input type="checkbox"/> | <input type="checkbox"/> |
| They performed all diagnostic/treatment procedures in a delicate manner                      | <input type="checkbox"/>  | <input type="checkbox"/> | <input type="checkbox"/> | <input type="checkbox"/> | <input type="checkbox"/> |
| They responded to my calls quickly                                                           | <input type="checkbox"/>  | <input type="checkbox"/> | <input type="checkbox"/> | <input type="checkbox"/> | <input type="checkbox"/> |
| They allowed my family to assist in my care                                                  | <input type="checkbox"/>  | <input type="checkbox"/> | <input type="checkbox"/> | <input type="checkbox"/> | <input type="checkbox"/> |
| They continuously observed me and monitored my health                                        | <input type="checkbox"/>  | <input type="checkbox"/> | <input type="checkbox"/> | <input type="checkbox"/> | <input type="checkbox"/> |
| They performed rapid diagnostics, so I was not kept waiting                                  | <input type="checkbox"/>  | <input type="checkbox"/> | <input type="checkbox"/> | <input type="checkbox"/> | <input type="checkbox"/> |
| They provided painkillers if necessary                                                       | <input type="checkbox"/>  | <input type="checkbox"/> | <input type="checkbox"/> | <input type="checkbox"/> | <input type="checkbox"/> |
